# Supplementary material
Source: MDPI journal article supplement (https://www.mdpi.com/2227-9040/10/2/72)
Supplement: s1 [file s1]

# Supporting Information

*for*

## A Novel Truncated DNzyme Modified Paper Analytical Device for Point-of-Care Test of Copper Ions in Natural Waters

Jiayi Wu <sup>1</sup>, Ming Wang <sup>1</sup>, Huanhuan Hong <sup>1</sup>, Jianyuan Lin <sup>2</sup>, Ning Gan <sup>1,\*</sup> and Wenchao Bi <sup>1,\*</sup>

- <sup>1</sup> Key Laboratory of Advanced Mass Spectrometry and Molecular Analysis of Zhejiang Province, Institute of Mass Spectrometry, School of Material Science and Chemical Engineering, Ningbo University, Ningbo 315211, China; hcchcnc@126.com (J.W.); wming1517@126.com (M.W.); honghuanhuan@nbu.edu.cn (H.H.)
- <sup>2</sup> College of Biology and Environment, Zhejiang WanLi University, Ningbo 315211, China; linjianyuan33@163.com
- \* Correspondence: ganning@nbu.edu.cn (N.G.); biwenchao@nbu.edu.cn (W.B.); Tel.: +86-(57)-487609983 (W.B)

### List

|                 |    |
|-----------------|----|
| Figure S1 ..... | 2  |
| Figure S2 ..... | 3  |
| Figure S3 ..... | 4  |
| Figure S4 ..... | 5  |
| Figure S5 ..... | 6  |
| Figure S6 ..... | 7  |
| Table S1 .....  | 8  |
| Table S2 .....  | 9  |
| Table S3 .....  | 10 |

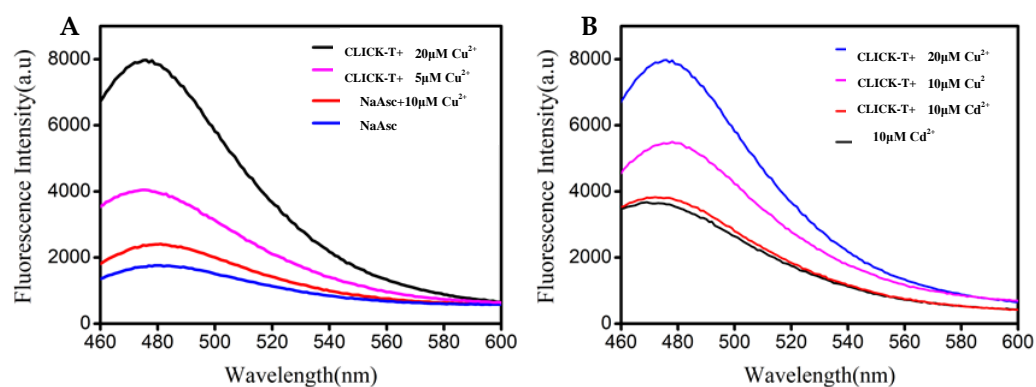

**Figure S1.** (A) The comparison of Cu<sup>2+</sup> catalyzed azide-alkyne click reaction with 4 μM CLICK T and conventional CuAAC based on 1 mM NaAsc reducing Cu<sup>2+</sup> to Cu<sup>+</sup>. (B) The comparison of Cu<sup>2+</sup> and Cd<sup>2+</sup> catalyzed azide-alkyne click reaction with 4 μM CLICK T. The concentrations of both AHC and BOL were 100 μM in pH 6.5 25 mM HEPES buffer and reacted for 20 min.

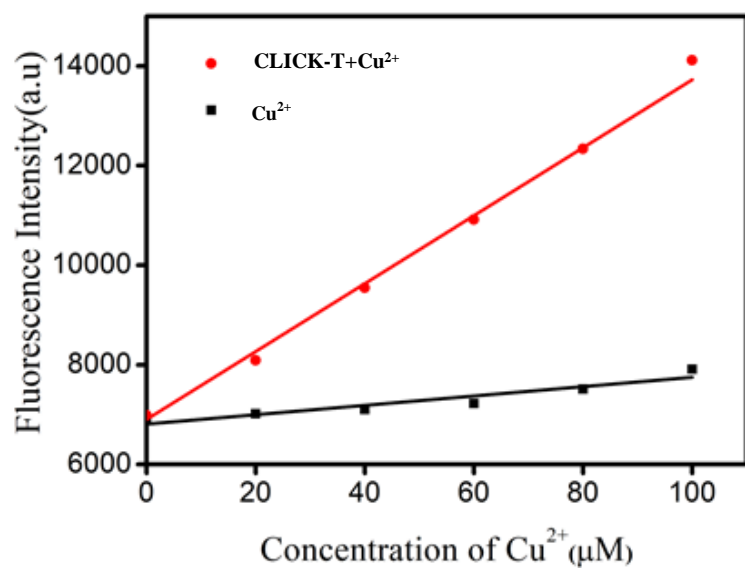

**Figure S2.** The comparison of  $\text{Cu}^{2+}$  catalyzed azide-alkyne click reaction with (red line) and without 4  $\mu\text{M}$  CLICK-T (black line). The concentrations of both AHC and BOL were 100  $\mu\text{M}$  in pH 6.5 25mM HEPES buffer and reacted for 20min.

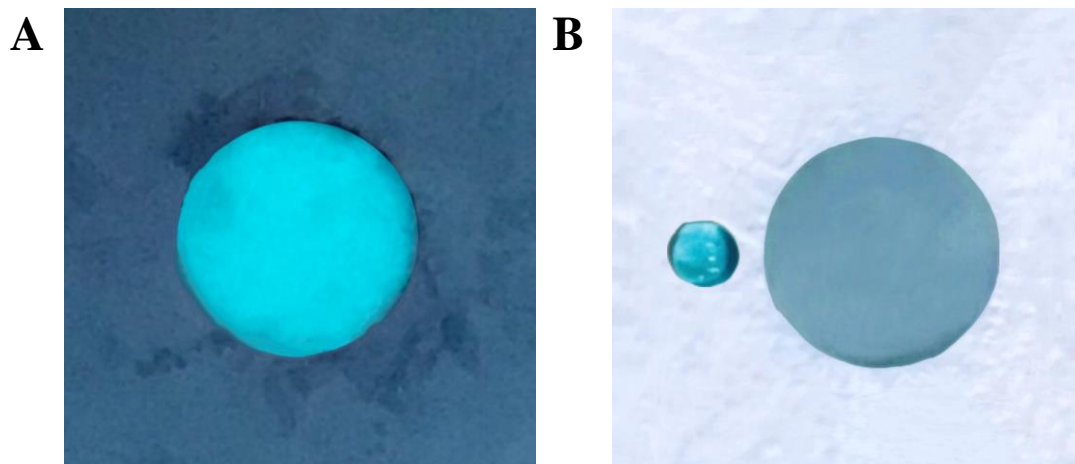

**Figure S3.** 10 $\mu$ L of 100 mM Cu<sup>2+</sup> was dripped on CLICK-T modified PDAs (A) Under ultraviolet light (365 nm) or without (B) UV light.

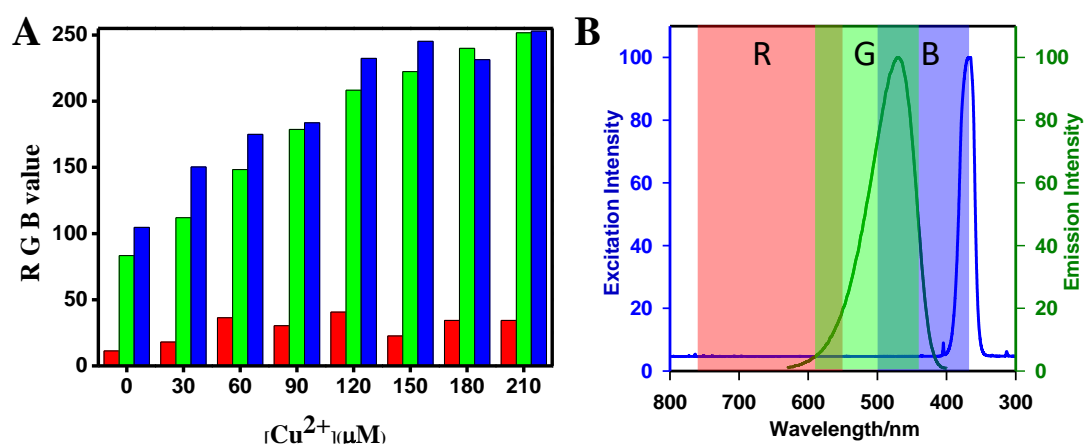

**Figure S4.** (A) PDA's RGB values obtained with the Pixolor App software app in the mobile phone versus the copper concentration. (B) The RGB distribution of the FL signal.

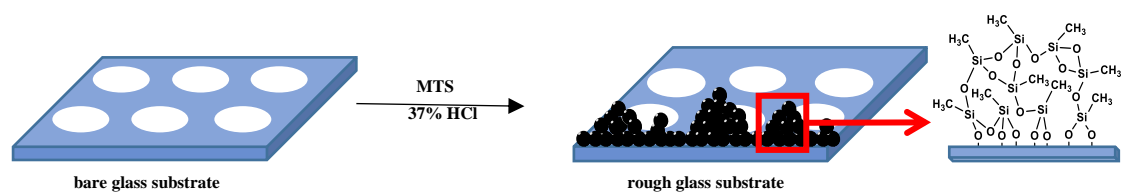

**Figure S5.** Schematic diagram of paper-based hydrophobization reaction.

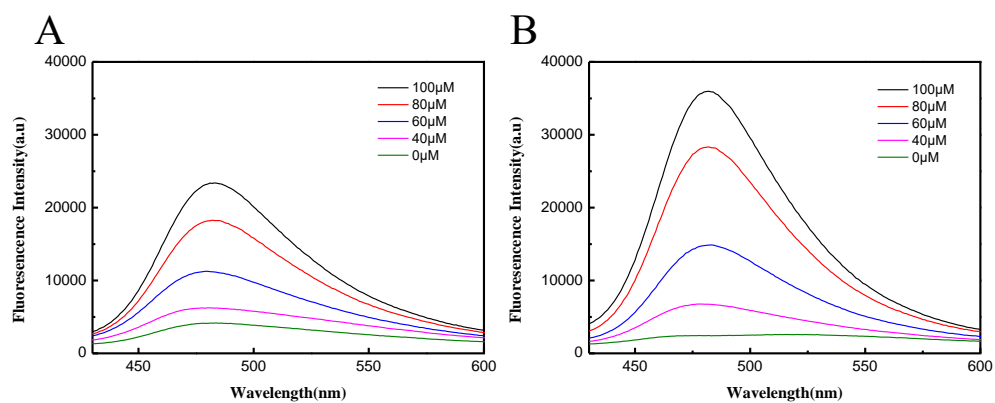

**Figure S6.** (A)  $\text{Cu}^+$  catalyzed the click reaction of 3-azide-7-hydroxycoumarin-hexynol. (B)  $\text{Cu}^+$  catalyzed the click reaction of 3-azide-7-hydroxycoumarin-butynol. The concentrations of AHC was 100  $\mu\text{M}$  in pH 6.5 25 mM HEPES buffer and reacted for 20 min.

**Table S1.** The base sequence of CLICK-17 and other DNA with random sequence.

| <b>Name</b>      | <b>Base sequence</b>                                                                                                      |
|------------------|---------------------------------------------------------------------------------------------------------------------------|
| <b>CLICK-17</b>  | 5'-GGA TCG TCA GTG CAT TGA GAT TA TTA TGC AAC TCTAT GGG<br>TCC ACT CTG TGA ATG TGA CGG TGG TAT CCG CAA CGG GTA-3'         |
| <b>Other DNA</b> | 5'-TAA TCC AGA TAG GGA GCA AAT CGT ACT CCC ATC TATA AAA<br>CCC TCT AGA CCT TTA ATA GGC AGT AAG TCA ATT TAA AAA ACC-<br>3' |

It has been reported that the shorter the ssDNA, the stronger its tissue penetration ability; moreover, an appropriate truncation of the DNzyme could remove additional bases that might hinder target binding [1]. The CLICK-17 that was obtained through the SELEX had 79 bases (Table S1). Its affinity constant to Cu(II) was shown in Table S2. Because the preparation cost of CLICK-17 was relatively high. Hence, it is necessary to optimize the original CLICK-17 DNzyme by removing the primers at both ends of CLICK-17.

CLICK-T1 (Table S1) was a sequence consisting of 40 bases obtained by removing the primers at both ends of CLICK-17. The  $K_d$  value showed it had good affinity for the target. Thus, we furthermore removed 3 base at both ends of structure of CLICK-T1, thereby yielded sequence CLICK-T2. It also had a slightly higher affinity for the target than CLICK-T1 (Table S1). Subsequently, 3 bases were removed simultaneously from the 5' and 3' ends of the CLICK-T2 sequence, generating the desirable sequence CLICK-T which was 18 bases, and reducing the  $K_d$  value of the sequence to  $28.12 \pm 2.77$  nM. Next, both ends of the CLICK-T were simultaneously and successively truncated, and sequences CLICK-T3 and CLICK-T4 were obtained. However, the affinity of these two sequences was not ideal, and their  $K_d$  values increased by an order of magnitude. Therefore, we employed CLICK-T as our final truncated DNzyme for Cu(II)AAC. All the explanation and Table S2 was added in the latest supplementary file.

**Table S2.** Sequence and dissociation constants ( $K_d$ ) for the studied DNzyme.

| Name     | Sequence (5' to 3')                                                                                            | $K_d$ [nM]   |
|----------|----------------------------------------------------------------------------------------------------------------|--------------|
| CLICK-17 | GGA TCG TCA GTG CAT TGA GAT TA TTA TGC AAC TCTAT<br>GGG TCC ACT CTG TGA ATG TGA CGG TGG TAT CCG CAA<br>CGG GTA | 52.32±3.43   |
| CLICK-T1 | CAT TGA GA TTA TTA TGC AAC TCTAT GGG TCC ACT CTG<br>TGA                                                        | 37.25±3.34   |
| CLICK-T2 | TGA GA TTA TTA TGC AAC TCTAT GGG TCC ACT                                                                       | 33.2 ± 1.2   |
| CLICK-T  | TTA TTA TGC AAC TCTAT G                                                                                        | 28.12 ± 2.77 |
| CLICK-T3 | TTA TGC AAC TCTAT GGG                                                                                          | 55.61±7.34   |
| CLICK-T4 | TTA TTA TGC AAC TCTA                                                                                           | 78.65±8.12   |

**Table S3.** The pH, dissolved oxygen, ion concentrations of the water samples.

| Sample            | pH  | Dissolved Oxygen Ion Concentrations |        |
|-------------------|-----|-------------------------------------|--------|
|                   |     | (mg/L)                              | (mg/L) |
| Fenghua river     | 6.5 | 7.6                                 | 320    |
| Yuyao river-1     | 6.5 | 8.3                                 | 400    |
| Yong river-2      | 7.2 | 9.5                                 | 620    |
| Ningbo university | 7.4 | 8.4                                 | 420    |
| Baixi reservoir   | 7.1 | 10.2                                | 200    |

#### Reference

[1] Sun, Y., Duan, N., Ma, P., Liang, Y., Zhu, X., Wang, Z. Colorimetric aptasensor based on truncated aptamer and trivalent DNzyme for *Vibrio parahaemolyticus* determination. *Journal of agricultural and food chemistry*, 2019, 67(8), 2313–2320.
